# Supplementary material
Source: PubMed Central journal article supplement (PMC4565167)
Supplement: open-2014-0055-strobe-statement.pdf [file open-2014-0055-strobe-statement.pdf]

**Maternal and Newborn Outcomes after a Prior Cesarean Birth by Planned Mode of Delivery and History of Prior Vaginal Birth in British Columbia, Canada: A Retrospective Cohort Study**

|                          | Item No | Page No | Recommendation                                                                                                                                                                                               |
|--------------------------|---------|---------|--------------------------------------------------------------------------------------------------------------------------------------------------------------------------------------------------------------|
| Title and abstract       | 1       | 1       | (a) Indicate the study’s design with a commonly used term in the title or the abstract                                                                                                                       |
|                          |         | 2-3     | (b) Provide in the abstract an informative and balanced summary of what was done and what was found                                                                                                          |
| Introduction             |         |         |                                                                                                                                                                                                              |
| Background/rationale     | 2       | 4       | Explain the scientific background and rationale for the investigation being reported                                                                                                                         |
| Objectives               | 3       | 4       | State specific objectives, including any prespecified hypotheses                                                                                                                                             |
| Methods                  |         |         |                                                                                                                                                                                                              |
| Study design             | 4       | 5       | Present key elements of study design early in the paper                                                                                                                                                      |
| Setting                  | 5       | 5       | Describe the setting, locations, and relevant dates, including periods of recruitment, exposure, follow-up, and data collection                                                                              |
| Participants             | 6       | 5       | (a) Give the eligibility criteria, and the sources and methods of selection of participants. Describe methods of follow-up                                                                                   |
|                          |         | NA      | (b) For matched studies, give matching criteria and number of exposed and unexposed                                                                                                                          |
| Variables                | 7       | 6       | Clearly define all outcomes, exposures, predictors, potential confounders, and effect modifiers. Give diagnostic criteria, if applicable                                                                     |
| Data sources/measurement | 8*      | 6       | For each variable of interest, give sources of data and details of methods of assessment (measurement). Describe comparability of assessment methods if there is more than one group                         |
| Bias                     | 9       | 5-6     | Describe any efforts to address potential sources of bias                                                                                                                                                    |
| Study size               | 10      | 6       | Explain how the study size was arrived at                                                                                                                                                                    |
| Quantitative variables   | 11      | 6       | Explain how quantitative variables were handled in the analyses. If applicable, describe which groupings were chosen and why                                                                                 |
| Statistical methods      | 12      | 6       | (a) Describe all statistical methods, including those used to control for confounding                                                                                                                        |
|                          |         | NA      | (b) Describe any methods used to examine subgroups and interactions                                                                                                                                          |
|                          |         | NA      | (c) Explain how missing data were addressed                                                                                                                                                                  |
|                          |         | NA      | (d) If applicable, explain how loss to follow-up was addressed                                                                                                                                               |
|                          |         | NA      | (e) Describe any sensitivity analyses                                                                                                                                                                        |
| Results                  |         |         |                                                                                                                                                                                                              |
| Participants             | 13*     | 7       | (a) Report numbers of individuals at each stage of study—eg numbers potentially eligible, examined for eligibility, confirmed eligible, included in the study, completing follow-up, and analysed            |
|                          |         | NA      | (b) Give reasons for non-participation at each stage                                                                                                                                                         |
|                          |         | NA      | (c) Consider use of a flow diagram                                                                                                                                                                           |
| Descriptive data         | 14*     | 7       | (a) Give characteristics of study participants (eg demographic, clinical, social) and information on exposures and potential confounders                                                                     |
|                          |         | 13      | (b) Indicate number of participants with missing data for each variable of interest                                                                                                                          |
|                          |         | NA      | (c) Summarise follow-up time (eg, average and total amount)                                                                                                                                                  |
| Outcome data             | 15*     | 7-9     | Report numbers of outcome events or summary measures over time                                                                                                                                               |
| Main results             | 16      | 7-9     | (a) Give unadjusted estimates and, if applicable, confounder-adjusted estimates and their precision (eg, 95% confidence interval). Make clear which confounders were adjusted for and why they were included |
|                          |         | 15-17   |                                                                                                                                                                                                              |
|                          |         | 13      | (b) Report category boundaries when continuous variables were categorized                                                                                                                                    |
|                          |         | 7-9     | (c) If relevant, consider translating estimates of relative risk into absolute risk for a meaningful time period                                                                                             |
| Other analyses           | 17      | NA      | Report other analyses done—eg analyses of subgroups and interactions, and sensitivity analyses                                                                                                               |

|                          |    |       |                                                                                                                                                                            |
|--------------------------|----|-------|----------------------------------------------------------------------------------------------------------------------------------------------------------------------------|
| <b>Discussion</b>        |    |       |                                                                                                                                                                            |
| Key results              | 18 | 9     | Summarise key results with reference to study objectives                                                                                                                   |
| Limitations              | 19 | 10-11 | Discuss limitations of the study, taking into account sources of potential bias or imprecision. Discuss both direction and magnitude of any potential bias                 |
| Interpretation           | 20 | 11-12 | Give a cautious overall interpretation of results considering objectives, limitations, multiplicity of analyses, results from similar studies, and other relevant evidence |
| Generalisability         | 21 | 10    | Discuss the generalisability (external validity) of the study results                                                                                                      |
| <b>Other information</b> |    |       |                                                                                                                                                                            |
| Funding                  | 22 | 19    | Give the source of funding and the role of the funders for the present study and, if applicable, for the original study on which the present article is based              |
